# Supplementary material for: Hepatitis B Virus Combo Mutations Improve the Prediction and Active Prophylaxis of Hepatocellular Carcinoma: A Clinic-Based Cohort Study
Source: Oxford University Press journal article supplement (doi:10.1158/1940-6207.capr-15-0160), 2015-08-19
Supplement: 19406207capr150160-sup-148590_2_supp_3081751_nsb13q.doc [file 19406207capr150160-sup-148590_2_supp_3081751_nsb13q.doc]

**Legends to Supplementary Figures**

**Supplementary Figure 1.**Flow diagram of cohort participants.

**Supplementary Figure 2.** The effect of antiviral treatment on HCC occurrence and liver death in patients with one or more HBV mutations (C1653T, T1753V, and A1762T/G1764A) and those without any of the mutations. (A) HCC occurrence in patients with one or more HBV mutations; (B) HCC occurrence in patients without any of the 3 mutations; (C) liver death in patients with one or more HBV mutations; (D) liver death in patients without any of the 3 mutations. *P* values, log-rank test.

**Supplementary Figure 3.** Effect of antiviral treatment on liver death of chronic HBV-infected patients with and without the significant viral mutation in the PS matched cohorts.(A) patients with A1762T/G1764A; (B) patients without A1762T/G1764A; (C) patients with C1653T; (D) patients without C1653T; (E) patients with T1753V; (F) patients without T1753V. *P* values, log-rank test.
